# Supplementary material for: Cross-reactive antibody response between SARS-CoV-2 and SARS-CoV infections
Source: PubMed Central journal article supplement (PMC7239046; doi:10.1101/2020.03.15.993097), 2020-03-17
Supplement: media-1.pdf [file media-1.pdf]

**Supplementary Table 1. Patient information, ELISA data, and neutralization data.**

| Patient ID | Gender | Age | day post-symptom onset | ELISA (OD <sub>450</sub> value at 1:100 dilution) |                |                |              | MN titer   |          |
|------------|--------|-----|------------------------|---------------------------------------------------|----------------|----------------|--------------|------------|----------|
|            |        |     |                        | SARS-CoV-2 spike                                  | SARS-CoV spike | SARS-CoV-2 RBD | SARS-CoV RBD | SARS-CoV-2 | SARS-CoV |
| #1         | M      | 56  | 6                      | 0.30                                              | 0.21           | 0.03           | 0.01         | <1:10      | <1:10    |
| #2         | F      | 62  | 4                      | 0.32                                              | 0.23           | 0.07           | 0.03         | <1:10      | <1:10    |
| #3         | F      | 62  | 22                     | 1.97                                              | 0.66           | 1.46           | 0.12         | 1:160      | <1:10    |
| #4         | M      | 63  | 22                     | 1.95                                              | 0.98           | 1.56           | 0.58         | 1:80       | <1:10    |
| #5         | M      | 47  | 8                      | 0.52                                              | 0.40           | 0.20           | 0.03         | 1:80       | <1:10    |
| #6         | M      | 64  | 19                     | 1.81                                              | 0.54           | 1.40           | 0.50         | 1:320      | <1:10    |
| #7         | F      | 73  | 18                     | 1.60                                              | 0.71           | 0.90           | 0.17         | 1:80       | <1:10    |
| #8         | M      | 72  | 18                     | 1.94                                              | 1.19           | 1.21           | 0.14         | 1:80       | <1:10    |
| #9         | F      | 37  | 2                      | -0.25                                             | -0.10          | -0.05          | -0.39        | <1:10      | <1:10    |
| #10        | F      | 72  | 10                     | 1.44                                              | 0.41           | 1.04           | -0.03        | 1:40       | <1:10    |
| #11        | M      | 60  | 22                     | 2.53                                              | 1.38           | 2.24           | 1.15         | 1:160      | <1:10    |
| #12        | M      | 56  | 13                     | 1.57                                              | 0.64           | 1.37           | 0.00         | 1:320      | <1:10    |
| #13        | F      | 55  | 11                     | 0.03                                              | -0.09          | 0.05           | 0.08         | <1:10      | <1:10    |
| #14        | F      | 63  | 19                     | 2.44                                              | 1.12           | 2.06           | 1.42         | 1:640      | <1:10    |
| #15        | M      | 37  | 14                     | 1.85                                              | 1.60           | 1.43           | 0.59         | 1:320      | 1:10     |

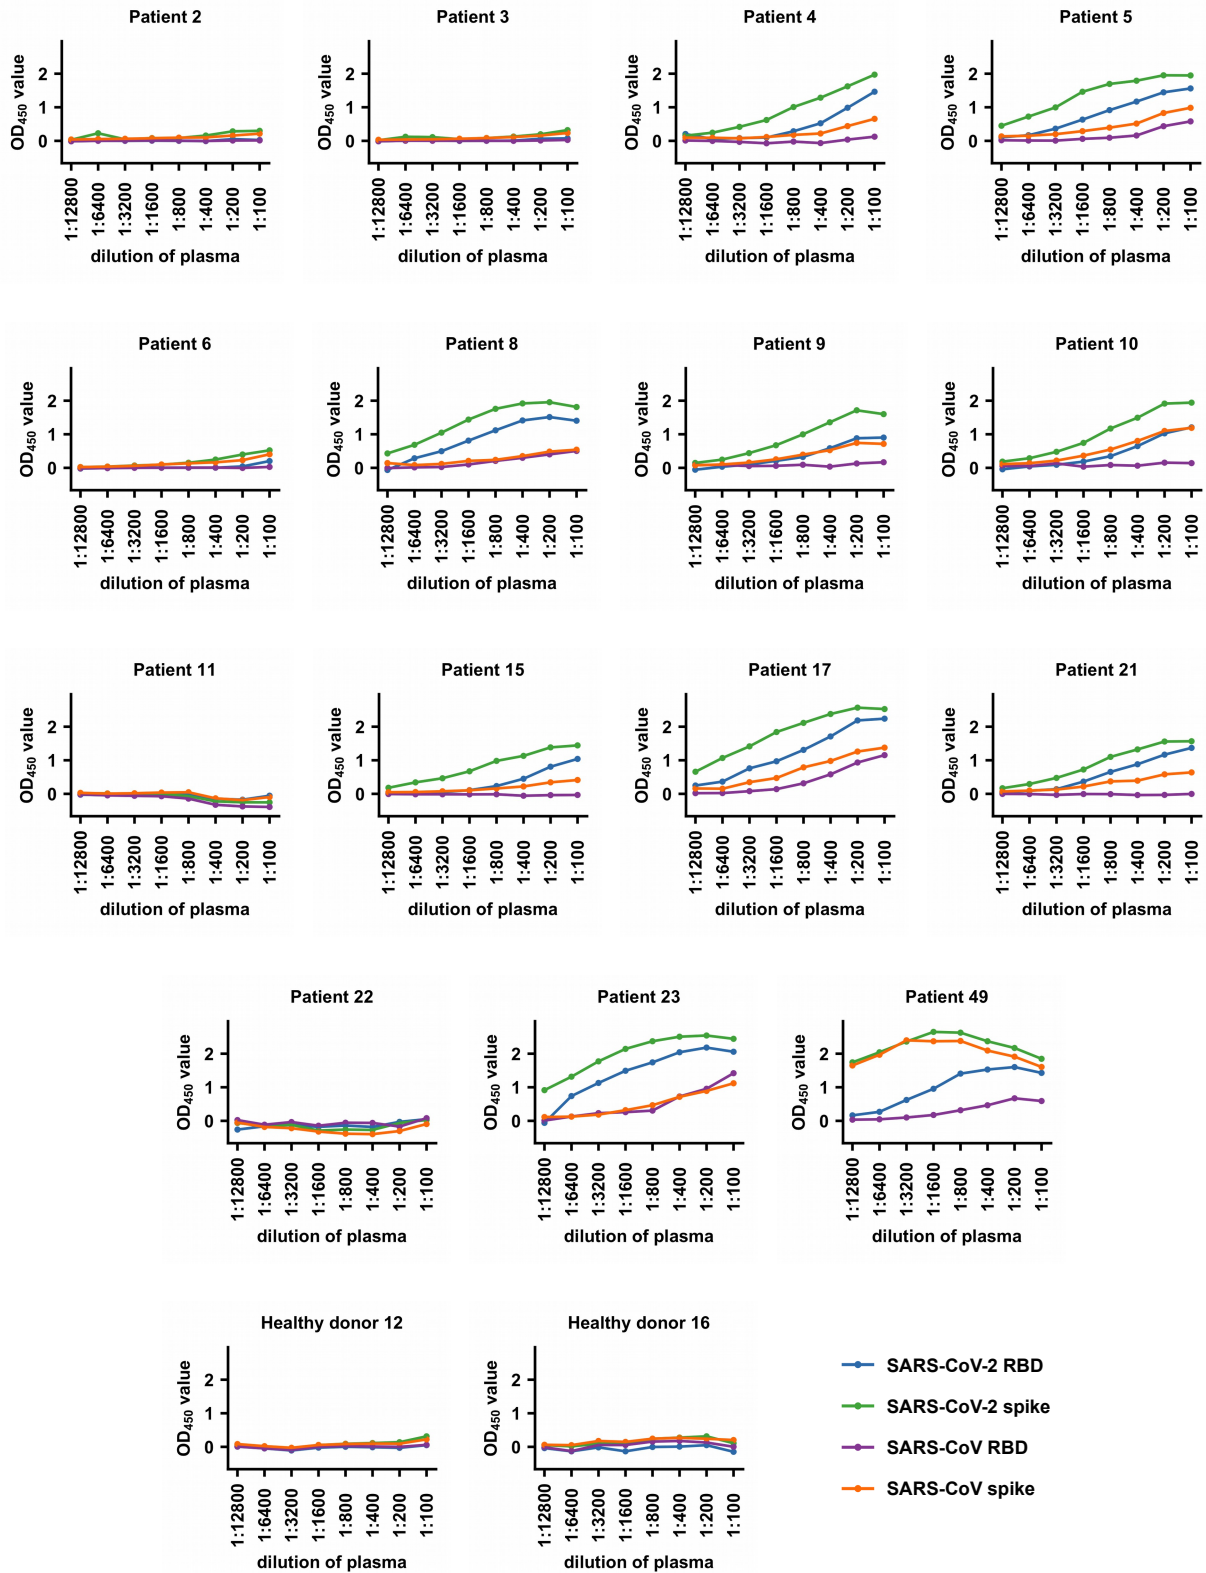

**Supplementary Figure 1. ELISA of patient samples at different dilutions.** Binding of different dilutions of plasma samples from patients and healthy donors to spike and RBD from SARS-CoV-2 and SARS-CoV was measured by ELISA. The mean  $OD_{450}$  values calculated after testing each plasma sample in duplicate are shown.

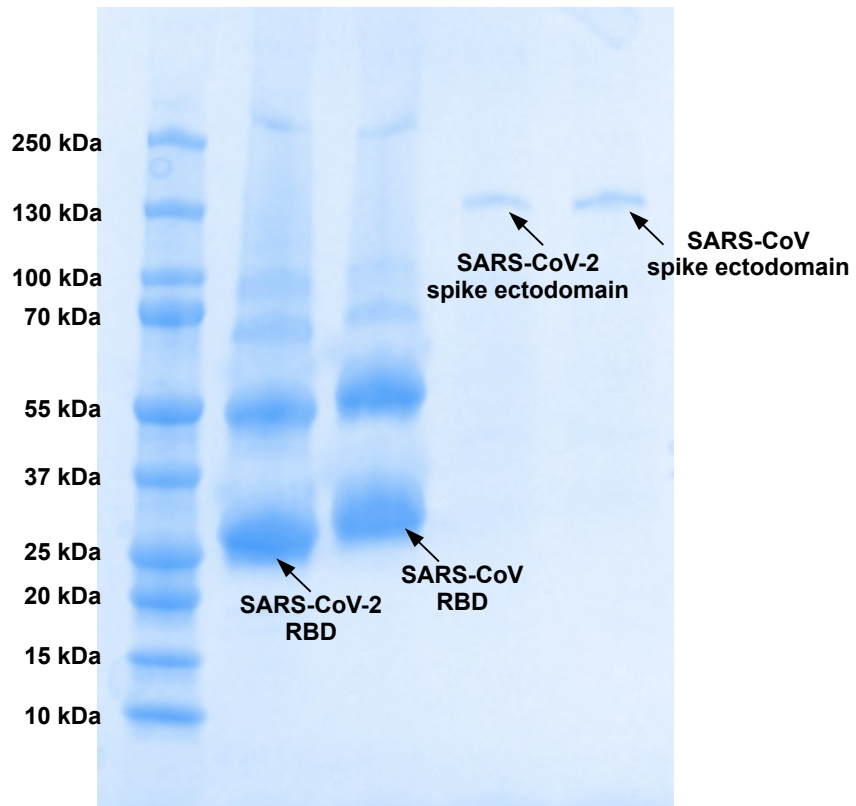

**Supplementary Figure 2. Protein expression.** Proteins purified by Ni-NTA beads from insect cell expression supernatant were analyzed by coomassie staining. The proteins were further purified by size exclusion chromatography before used.
